# Supplementary material
Source: publisher site journal article supplement (https://www.dovepress.com/article/235293)
Supplement: Supplementary file 1 [file get_supplementary_file.php]

**Supplementary Material**

**Appendix 1. List of Participating Micro-invasive Glaucoma Surgery (MIGS) Study Group Surgeons**

| **Surgeon Name** | **Location** | **Study Participation** |
| --- | --- | --- |
| Iqbal Ike K. Ahmed, MD | Toronto, Ontario, Canada | Visiting surgeon |
| John P. Berdahl, MD | Sioux Falls, South Dakota, USA | Visiting surgeon |
| Richard Lewis, MD | Sacramento, California, USA | Visiting surgeon |
| John A. Hovanesian, MD | Laguna Hills, California, USA | Visiting surgeon |
| Jonathan Myers, MD | Philadelphia, Pennsylvania, USA | Visiting surgeon |
| Ilesh Patel, MD | Kirribilli, New South Wales, Australia | Visiting surgeon |
| Douglas J. Rhee, MD | Cleveland, Ohio, USA | Visiting surgeon |
| Steven R. Sarkisian, Jr., MD | Oklahoma City, Oklahoma, USA | Visiting surgeon |
| David Manning, MD | New South Wales, Australia | Visiting surgeon |
| Richard L. Lindstrom, MD | Minneapolis, Minnesota, USA | Visiting surgeon |
| Lilit Voskanyan, MD | S.V. Malayan Opthalmology Centre  Yerevan, Armenia | Staff surgeon |

**Medical Monitor**: L.J. Katz, MD, Wills Eye Hospital, Jefferson Medical College, Philadelphia, PA, USA. Email: ljaykatz@gmail.com
